# Supplementary material for: PpASCL, the Physcomitrella patens Anther-Specific Chalcone Synthase-Like Enzyme Implicated in Sporopollenin Biosynthesis, Is Needed for Integrity of the Moss Spore Wall and Spore Viability
Source: PubMed Central journal article supplement (PMC4709238; doi:10.1371/journal.pone.0146817), 2016-01-11

**S1 Fig.** Southern blot analysis of *ascl-2*.

Southern blot of *AcII* restricted *pabB4* control and *ascl-2* gDNA, hybridized with a DIG-labelled probe specific to the *npt-II* resistance cassette. Probe hybridization is denoted by an arrowhead. The positions of DNA size markers are indicated at left. The expected size of the *AcII* restriction fragment from a recombinant, i.e. mutant, *PpASCL* allele is 5991 bp.

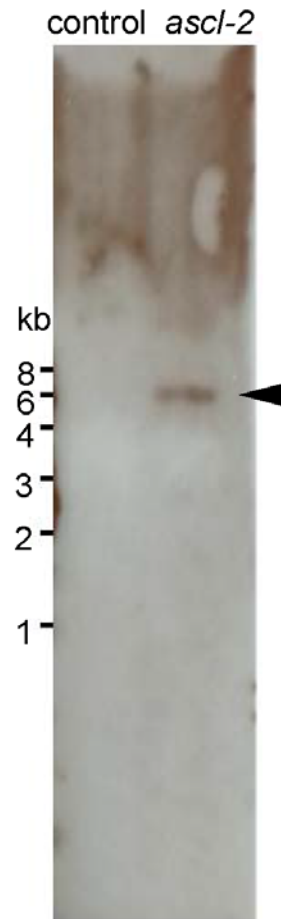

Supplement: pone.0146817.s001.pdf [file pone.0146817.s001.pdf]
