# Supplementary material for: PpASCL, the Physcomitrella patens Anther-Specific Chalcone Synthase-Like Enzyme Implicated in Sporopollenin Biosynthesis, Is Needed for Integrity of the Moss Spore Wall and Spore Viability
Source: PubMed Central journal article supplement (PMC4709238; doi:10.1371/journal.pone.0146817), 2016-01-11

**S2 Fig.** Photomicrographs of *pabB4* control and *ascl-2* gametophytes. Six weeks old, vegetatively propagated colonies of *pabB4* and *ascl-2*. Scale bars = 5 mm.

control

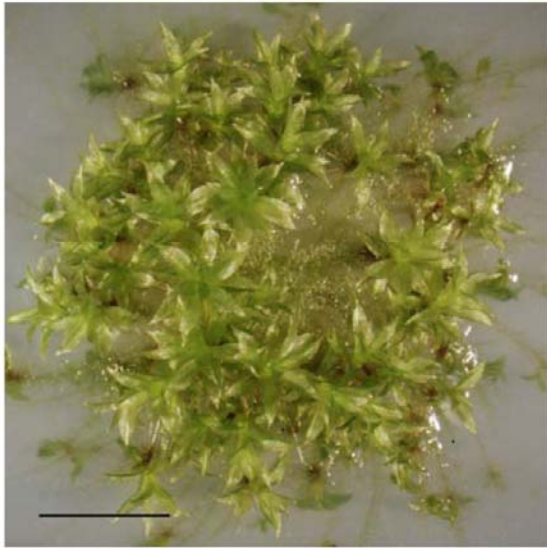

*ascl-2*

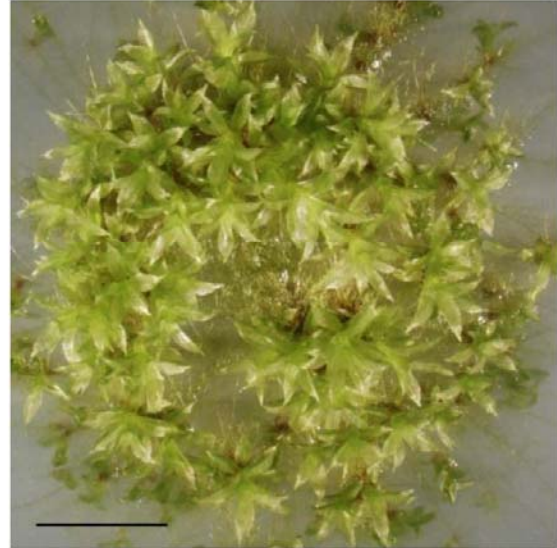

Supplement: pone.0146817.s002.pdf [file pone.0146817.s002.pdf]
