# Supplementary material for: PpASCL, the Physcomitrella patens Anther-Specific Chalcone Synthase-Like Enzyme Implicated in Sporopollenin Biosynthesis, Is Needed for Integrity of the Moss Spore Wall and Spore Viability
Source: PubMed Central journal article supplement (PMC4709238; doi:10.1371/journal.pone.0146817), 2016-01-11

**S3 Fig.** Morphologies of control (*pabB4*) and *ascl* spores.

(a–d) Photomicrographs of spores isolated from mature sporophytes. Fractured *ascl* spore walls are clearly visible in (b) and (c). *Ascl* plants produced smaller spores. The diameter of control spores was  $28 \pm 2.0 \mu\text{m}$  ( $n = 132$ , mean  $\pm$  S.D.); the longest dimension of *ascl* spores was  $20 \pm 1.7 \mu\text{m}$  ( $n = 63$ ),  $18 \pm 1.9$  ( $n = 146$ ) and  $19 \pm 2.2$  ( $n = 39$ ) in *ascl-1*, *ascl-2* and *ascl-3*, respectively. The *ascl* spores were significantly smaller than the control spores (ANOVA,  $p < 0.0001$ ). (e–l) SEM images of fixed, gold-coated spores. All scale bars =  $10 \mu\text{m}$ .

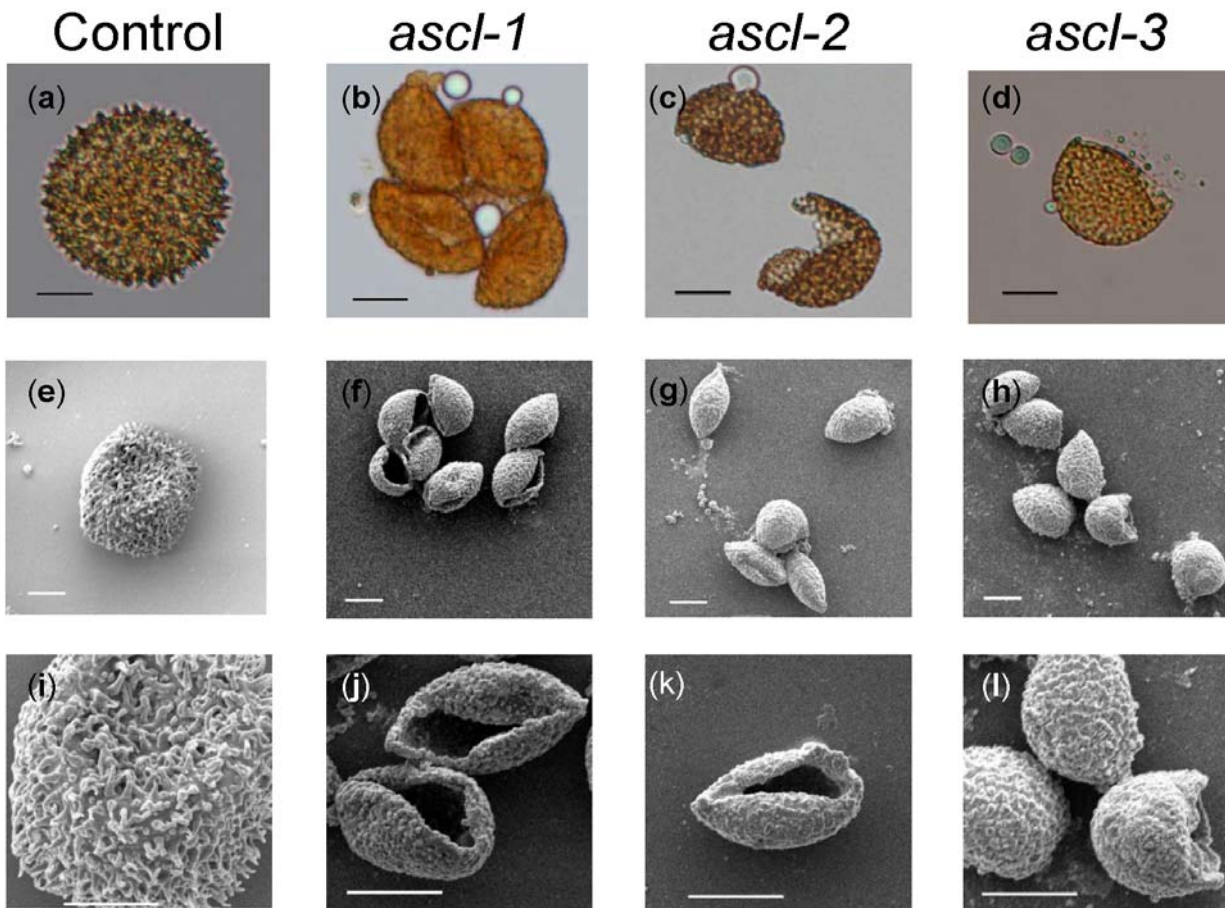

Supplement: pone.0146817.s003.pdf [file pone.0146817.s003.pdf]
