# Supplementary material for: PpASCL, the Physcomitrella patens Anther-Specific Chalcone Synthase-Like Enzyme Implicated in Sporopollenin Biosynthesis, Is Needed for Integrity of the Moss Spore Wall and Spore Viability
Source: PubMed Central journal article supplement (PMC4709238; doi:10.1371/journal.pone.0146817), 2016-01-11
Supplement: pone.0146817.s005.pdf [file pone.0146817.s005.pdf]

**S1 Table.** Primer sequences.

| Primer                                            | Sequence (5' → 3')                            | Primer binding site <sup>a</sup> |
|---------------------------------------------------|-----------------------------------------------|----------------------------------|
| Linear knockout construct generation <sup>b</sup> |                                               |                                  |
| 5'F-ASCL-ClaI                                     | GCACGG <u>ATCGATTAATGTTGGAAGTTGTGATTGGAAT</u> | -549...-522 <sup>c</sup>         |
| 5'R-ASCL-ClaI                                     | GCACGG <u>ATCGATGCTCGTCCAAAATTTCTTTGTT</u>    | 422...446                        |
| 3'F-ASCL-NdeI                                     | GGAATTCC <u>CATATGCTACGGGGGCGCTTCT</u>        | 694...712                        |
| 3'R-ASCL-NdeI                                     | GGAATTCC <u>CATATGACACCAGGACCGAAGGCAA</u>     | 1430...1450                      |
| PCR analysis of stable transformants              |                                               |                                  |
| ASCL-gDNA-F                                       | CTTACACATCACTCACTTATTCTGCTGCTT                | -792...-763                      |
| ASCL-gDNA-R                                       | GAGAATAATACGATCCCTCTCTCAGTTTGA                | 1661...1690                      |
| pTN182-5'-R                                       | TTGAAAAGTGTC AATAGCCCTTTGG                    | -380...-356 <sup>d</sup>         |
| pTN182-3'-F                                       | ATTGGTATCAGGGCCATGAATAGGT                     | 1416...1440                      |
| Southern blot analysis                            |                                               |                                  |
| pTN-G418-F                                        | GTGGAGAGGCTATTCGGCTATGACT                     | 46...70                          |
| pTN-G418-R                                        | AACTCGTCAAGAAGGCGATAGAAGG                     | 764...788                        |
| RT-PCR                                            |                                               |                                  |
| ASCL-RT-F                                         | AACGACCATGGCAAGTCGAAGGGTCGAGGCG               | -7...24                          |
| ASCL-RT-R                                         | ACGTGCTGCTGCTGATGTTCCCG                       | 1314...1336                      |
| Actin3-F                                          | ATGGCTGGAGAGGGTGAGGATGTCC                     | 1...25 <sup>e</sup>              |
| Actin3-R                                          | CCACATCTGCTGGAACGTACTCAGCG                    | 1236...1261                      |

<sup>a</sup> Nucleotide numbering is in relation to the translation initiation codon, starting with number 1 at the A of the ATG.

<sup>b</sup> *PpASCL* locus-specific regions are underlined and restriction sites are highlighted.

<sup>c</sup> *PpASCL* gene sequence (locus name, Phpat.002G137300) is available in the Phytozome database ([phytozome.jgi.doe.gov/](http://phytozome.jgi.doe.gov/)).

<sup>d</sup> Gene accession number of pTN182 is AB267706. Nucleotide numbering of pTN182 based primers is in relation to the translation initiation codon of *nptII*.

<sup>e</sup> Gene accession number of *Physcomitrella Actin3* is AY382283.
