# Supplementary material for: PpASCL, the Physcomitrella patens Anther-Specific Chalcone Synthase-Like Enzyme Implicated in Sporopollenin Biosynthesis, Is Needed for Integrity of the Moss Spore Wall and Spore Viability
Source: PubMed Central journal article supplement (PMC4709238; doi:10.1371/journal.pone.0146817), 2016-01-11
Supplement: pone.0146817.s007.pdf [file pone.0146817.s007.pdf]

**S3 Table.** Raw data of sporophytic development.

The number of sporophytes at each developmental stage is given as a percentage of the total number in a culture tube. Percentage values are presented in a green-yellow heat map where the shade of green indicates higher values and that of yellow lower values.

(1) *ascl-2*

| <i>ascl-2</i>         |          | Percentage of sporophytes at each stage |                    |       |        |        |             |       |
|-----------------------|----------|-----------------------------------------|--------------------|-------|--------|--------|-------------|-------|
| Days after irrigation | Total SP | Initial development                     | Capsule elongation | Green | Yellow | Orange | Dehiscenced | Brown |
| 6                     | 53       | 96                                      | 0.0                | 1.9   | 0.0    | 1.9    | 0.0         | 0.0   |
| 7                     | 31       | 94                                      | 0.0                | 0.0   | 3.2    | 0.0    | 0.0         | 3.2   |
| 10                    | 17       | 59                                      | 41                 | 0.0   | 0.0    | 0.0    | 0.0         | 0.0   |
| 12                    | 24       | 21                                      | 79                 | 0.0   | 0.0    | 0.0    | 0.0         | 0.0   |
| 12                    | 6        | 50                                      | 50                 | 0.0   | 0.0    | 0.0    | 0.0         | 0.0   |
| 12                    | 45       | 44                                      | 44                 | 2.2   | 4.4    | 4.4    | 0.0         | 0.0   |
| 14                    | 65       | 12                                      | 68                 | 20    | 0.0    | 0.0    | 0.0         | 0.0   |
| 15                    | 37       | 46                                      | 35                 | 19    | 0.0    | 0.0    | 0.0         | 0.0   |
| 17                    | 85       | 5.9                                     | 19                 | 69    | 0.0    | 3.5    | 2.4         | 0.0   |
| 17                    | 32       | 19                                      | 25                 | 56    | 0.0    | 0.0    | 0.0         | 0.0   |
| 18                    | 15       | 20                                      | 20                 | 60    | 0.0    | 0.0    | 0.0         | 0.0   |
| 19                    | 76       | 1.3                                     | 5.3                | 90    | 1.3    | 2.6    | 0.0         | 0.0   |
| 20                    | 58       | 6.9                                     | 22                 | 57    | 14     | 0.0    | 0.0         | 0.0   |
| 21                    | 20       | 10                                      | 45                 | 10    | 35     | 0.0    | 0.0         | 0.0   |
| 21                    | 57       | 1.8                                     | 12                 | 46    | 26     | 3.5    | 3.5         | 7.0   |
| 22                    | 19       | 16                                      | 11                 | 32    | 42     | 0.0    | 0.0         | 0.0   |
| 22                    | 56       | 3.6                                     | 8.9                | 43    | 41     | 3.6    | 0.0         | 0.0   |
| 25                    | 66       | 1.5                                     | 3.0                | 7.6   | 15     | 73     | 0.0         | 0.0   |
| 25                    | 58       | 3.4                                     | 10                 | 22    | 17     | 41     | 0.0         | 5.2   |
| 26                    | 46       | 8.7                                     | 17                 | 11    | 17     | 46     | 0.0         | 0.0   |
| 27                    | 54       | 3.7                                     | 3.7                | 24    | 5.6    | 56     | 0.0         | 7.4   |
| 30                    | 58       | 3.4                                     | 0.0                | 3.4   | 8.6    | 76     | 0.0         | 8.6   |
| 33                    | 37       | 30                                      | 2.7                | 8.1   | 5.4    | 54     | 0.0         | 0.0   |
| 37                    | 70       | 4.3                                     | 2.9                | 1.4   | 0.0    | 87     | 1.4         | 2.9   |
| 48                    | 57       | 7.0                                     | 7.0                | 5.3   | 1.8    | 47     | 0.0         | 32    |
| 52                    | 47       | 0.0                                     | 0.0                | 0.0   | 0.0    | 79     | 0.0         | 21    |
| 52                    | 41       | 2.4                                     | 4.9                | 17    | 7.3    | 39     | 2.4         | 27    |
| 59                    | 89       | 10                                      | 6.7                | 3.4   | 1.1    | 53     | 2.2         | 24    |
| 60                    | 63       | 13                                      | 0.0                | 0.0   | 0.0    | 59     | 6.3         | 22    |
| 65                    | 54       | 5.6                                     | 7.4                | 1.9   | 1.9    | 67     | 1.9         | 15    |
| 68                    | 47       | 19                                      | 0.0                | 2.1   | 0.0    | 55     | 6.4         | 17    |
| 68                    | 25       | 0.0                                     | 0.0                | 4.0   | 0.0    | 52     | 4.0         | 40    |

(2) Control (*pabB4*)

| Control               |          | Percentage of sporophytes at each stage |                    |       |        |        |          |       |
|-----------------------|----------|-----------------------------------------|--------------------|-------|--------|--------|----------|-------|
| Days after irrigation | Total SP | Initial development                     | Capsule elongation | Green | Yellow | Orange | Dehisced | Brown |
| 6                     | 53       | 96                                      | 1.9                | 0.0   | 1.9    | 0.0    | 0.0      | -     |
| 7                     | 53       | 77                                      | 1.9                | 1.9   | 3.8    | 11     | 3.8      | -     |
| 10                    | 18       | 56                                      | 44                 | 0.0   | 0.0    | 0.0    | 0.0      | -     |
| 12                    | 63       | 37                                      | 57                 | 0.0   | 0.0    | 6.3    | 0.0      | -     |
| 12                    | 22       | 23                                      | 73                 | 4.5   | 0.0    | 0.0    | 0.0      | -     |
| 13                    | 61       | 53                                      | 39                 | 4.9   | 0.0    | 0.0    | 3.3      | -     |
| 14                    | 57       | 14                                      | 74                 | 12    | 0.0    | 0.0    | 0.0      | -     |
| 15                    | 13       | 31                                      | 23                 | 46    | 0.0    | 0.0    | 0.0      | -     |
| 15                    | 68       | 15                                      | 43                 | 40    | 1.5    | 1.5    | 0.0      | -     |
| 17                    | 82       | 7.3                                     | 20                 | 71    | 0.0    | 2.4    | 0.0      | -     |
| 18                    | 16       | 13                                      | 31                 | 56    | 0.0    | 0.0    | 0.0      | -     |
| 18                    | 18       | 11                                      | 17                 | 72    | 0.0    | 0.0    | 0.0      | -     |
| 19                    | 52       | 13                                      | 15                 | 66    | 0.0    | 3.8    | 0.0      | -     |
| 19                    | 77       | 3.9                                     | 9.1                | 83    | 0.0    | 3.9    | 0.0      | -     |
| 20                    | 29       | 6.9                                     | 28                 | 66    | 0.0    | 0.0    | 0.0      | -     |
| 21                    | 47       | 2.1                                     | 13                 | 34    | 51     | 0.0    | 0.0      | -     |
| 21                    | 22       | 0.0                                     | 23                 | 55    | 23     | 0.0    | 0.0      | -     |
| 21                    | 91       | 4.4                                     | 9.9                | 37    | 26     | 8.8    | 12       | 1.0   |
| 22                    | 23       | 13                                      | 17                 | 30    | 39     | 0.0    | 0.0      | -     |
| 22                    | 46       | 4.3                                     | 17                 | 37    | 37     | 4.3    | 0.0      | -     |
| 24                    | 31       | 13                                      | 6.5                | 26    | 55     | 0.0    | 0.0      | -     |
| 25                    | 77       | 3.9                                     | 2.6                | 20    | 38     | 36     | 0.0      | -     |
| 25                    | 91       | 3.3                                     | 5.5                | 9.9   | 37     | 41     | 3.3      | -     |
| 27                    | 65       | 1.5                                     | 4.6                | 3.1   | 22     | 69     | 0.0      | -     |
| 27                    | 84       | 4.8                                     | 1.2                | 9.5   | 16     | 69     | 0.0      | -     |
| 30                    | 71       | 2.8                                     | 5.6                | 4.2   | 7.0    | 80     | 0.0      | -     |
| 31                    | 88       | 6.8                                     | 0.0                | 10    | 13     | 71     | 0.0      | -     |
| 31                    | 34       | 5.9                                     | 5.9                | 0.0   | 15     | 74     | 0.0      | -     |
| 33                    | 48       | 29                                      | 6.3                | 10    | 4.2    | 48     | 2.1      | -     |
| 39                    | 87       | 14                                      | 5.7                | 4.6   | 8.0    | 68     | 0.0      | -     |
| 44                    | 56       | 18                                      | 5.4                | 1.8   | 3.6    | 70     | 1.8      | -     |
| 46                    | 94       | 4.3                                     | 1.1                | 2.1   | 4.3    | 81     | 7.4      | -     |
| 48                    | 64       | 6.3                                     | 11                 | 22    | 14     | 47     | 0.0      | -     |
| 52                    | 82       | 11                                      | 4.9                | 3.7   | 6.1    | 34     | 40       | -     |
| 52                    | 37       | 0.0                                     | 0.0                | 2.7   | 8.1    | 32     | 57       | -     |
| 53                    | 29       | 0.0                                     | 10                 | 10    | 24     | 35     | 21       | -     |
| 65                    | 47       | 0.0                                     | 0.0                | 0.0   | 0.0    | 13     | 87       | -     |
| 95                    | 31       | 9.7                                     | 3.2                | 3.2   | 3.2    | 32     | 48       | -     |
